# Supplementary material for: How to interpret a paediatric blood culture
Source: HighWire-hosted journal article supplement (doi:10.1136/archdischild-2020-321121), 2021-02-26
Supplement: archdischild-2020-321121supp001_data_supplement.pdf [file archdischild-2020-321121supp001_data_supplement.pdf]

# How to Interpret a Paediatric Blood Culture

O'Hagan S, Nelson P, Speirs L, Moriarty P, Mallett P. – ADC E&P 2021

## Diagnostic Stewardship

Diagnostic stewardship means testing the right patients for the right reasons. If you don't suspect a Blood Stream Infection (BSI), don't send a BC.

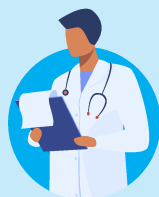

### Consider:

- Presentation and illness severity
- Probable source of infection
- Past medical history
- BSI risk factors

**Pre-test Probability**

## Blood Culture Volume is Key

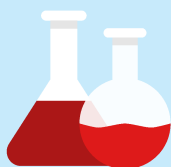

### Suggested Minimum BC Volumes

|              |           |
|--------------|-----------|
| <1 kg        | ~0.5ml    |
| <5 kg        | 0.5 – 1ml |
| <1 year      | 1 ml      |
| 2 – 5 years  | 2 – 5 ml  |
| 5 – 16 years | 5 – 15ml  |

## Antibiotics

Consider stopping antibiotics at 24-36 hours if BC negative-to-date and low suspicion of BSI.

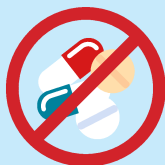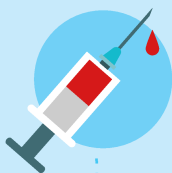

## Negative Blood Culture

Negative BC doesn't always exclude BSI, especially if a small inoculum was obtained. In any child with high pre-test probability and negative BC to date, consider repeat BC and review antibiotic treatment.

## Holistic Approach

Adopt a holistic approach when interpreting the significance of a positive culture - does this fit with the clinical picture; is this bug a common pathogen or possible contaminant? Liaise with Microbiology colleagues for advice.

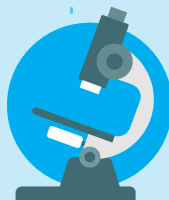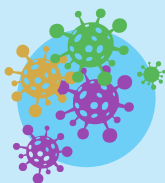

## Persistent Positivity

When the same bug is repeatedly isolated, thorough daily clinical re-evaluation & early liaison with Infectious Diseases is warranted.

There must be active attempts for source identification and concerted efforts to achieve source control.
